# Supplementary material for: Economic evaluation of policy options for dialysis in end-stage renal disease patients under the universal health coverage in Indonesia
Source: PubMed Central journal article supplement (PMC5436694; doi:10.1371/journal.pone.0177436), 2017-05-18

|                         |           |
|-------------------------|-----------|
| <b>Total entry data</b> | <b>68</b> |
| <b>CAPD</b>             | <b>41</b> |
| <b>HD</b>               | <b>27</b> |

|                  |          |    |
|------------------|----------|----|
| <b>Age group</b> | <b>n</b> |    |
| < 20 y.o.        |          | 0  |
| 20 - 30          |          | 8  |
| 31 - 40          |          | 17 |
| 41 - 50          |          | 15 |
| 51 - 60          |          | 14 |
| 61 - 70          |          | 9  |
| > 70 y.o.        |          | 5  |

|               |          |    |
|---------------|----------|----|
| <b>Gender</b> | <b>n</b> |    |
| Male          |          | 38 |
| Female        |          | 30 |

|                        |          |    |
|------------------------|----------|----|
| <b>Education level</b> | <b>n</b> |    |
| No schooling           |          | 1  |
| Primary School         |          | 13 |
| Junior High School     |          | 5  |
| High School            |          | 25 |
| College or above       |          | 24 |

|                        |          |    |
|------------------------|----------|----|
| <b>Initial Therapy</b> | <b>n</b> |    |
| CAPD                   |          | 3  |
| HD                     |          | 65 |

|                        |          |    |
|------------------------|----------|----|
| <b>Current Therapy</b> | <b>n</b> |    |
| CAPD                   |          | 41 |
| HD                     |          | 27 |

| <b>Duration of Therapy</b> | <b>n</b> |
|----------------------------|----------|
| < 12 months                | 12       |
| 12 -24 months              | 29       |
| > 24 months                | 25       |
| missing                    | 2        |

| <b>Comorbidities</b> | <b>n</b> | Total = 68 |
|----------------------|----------|------------|
| None                 | 3        |            |
| Yes                  | 64       |            |
| Missing              | 1        |            |

| <b>Number of Comorbidities</b> | <b>n</b> | Total = 68 |
|--------------------------------|----------|------------|
| One                            | 30       |            |
| Two                            | 35       |            |
| More than two                  | 2        |            |
| Missing                        | 1        |            |

| <b>Type of Comorbidities</b> | <b>n</b> | Total =56 |
|------------------------------|----------|-----------|
| Diabetes Mellitus (DM)       | 1        |           |
| Hypertension (HT)            | 25       |           |
| DM and HT                    | 11       |           |
| Others                       | 19       |           |

\*Others = Hepatitis, SLE, hyperuricemia, asthma, lupus, gastritis

| <b>History of Hospital Admission</b> | <b>n</b> |
|--------------------------------------|----------|
| Yes                                  | 31       |
| No                                   | 37       |

\*Reason: infection (incl. peritonitis), high blood pressure, anemia, dyspneu, bleeding, hypoalbuminemia, etc

**Av. Duration of Hospital Admission 7.96 days**  
(2 - 60 days)

**Companion to Hospital**

|         | <b>n</b> |
|---------|----------|
| Yes     | 53       |
| No      | 14       |
| Missing | 1        |

**Companion**

|                   | <b>n</b> |
|-------------------|----------|
| Family            | 51       |
| Other than family | 2        |

**Av. Number of companion****0,913 = 1 person**

(1 - 3 person)

**Time spent in the hospital**

|                  |          |
|------------------|----------|
| Av. CAPD patient | 182 mins |
| Av. HD patient   | 313 mins |

**Transportation**

|                   |    |
|-------------------|----|
| Private transport | 40 |
| Public transport  | 26 |
| Combined          | 2  |

|                                                     |                                  |
|-----------------------------------------------------|----------------------------------|
| <b>Av. Transportation time</b>                      | <b>85 mins</b>                   |
| <b>Employment (patient) - total</b>                 | <b>n</b>                         |
| Employed                                            | 23                               |
| Unemployed                                          | 45                               |
| Missing                                             | 1                                |
| <b>Employment - CAPD</b>                            | <b>n</b>                         |
| Employed                                            | 13                               |
| Unemployed                                          | 28                               |
| <b>Employment - HD</b>                              | <b>n</b>                         |
| Employed                                            | 10                               |
| Unemployed                                          | 17                               |
| <b>Type of Work - Patient</b>                       | <b>n</b>                         |
| Full time                                           | 9                                |
| Part time                                           | 4                                |
| Entrepreneur                                        | 10                               |
| <b>Av. days leaving work to hospital - patients</b> | <b>n</b>                         |
| Total patients                                      | 3.347 (1-12 days)                |
| CAPD patient                                        | 1.46 (1-2 days)                  |
| HD patient                                          | 5.8 (5-12 days)                  |
| <b>Av. Salary - Patient</b>                         | <b>n</b>                         |
| Total                                               | 3,642,658 (200,000 - 14,500,000) |
| CAPD patient                                        | 4,194,872 (200,000 - 14,500,000) |
| HD patient                                          | 2,924,780 (200,000 - 5,107,800)  |
| <b>Employment (companion)</b>                       | <b>n</b>                         |
| Employed                                            | 31                               |
| Unemployed                                          | 18                               |
| Missing                                             | 2                                |
| <b>Type of Work - Companion</b>                     | <b>n</b>                         |
| Full time                                           | 17                               |
| Part time                                           | 4                                |
| Entrepreneur                                        | 9                                |
| *Working for patient as driver                      | 1                                |

**Av. Days leaving work to hospital - companion**

|       | <b>n</b>  |               |
|-------|-----------|---------------|
| Total | 2.23 days | (1-8 days)    |
| CAPD  | 1.2 days  | (0.33-8 days) |
| HD    | 3.91 days | (1-8 days)    |

**Av. Salary - Companion**

|       | <b>n</b>  |                        |
|-------|-----------|------------------------|
| Total | 3,031,775 | (300,000 - 20,000,000) |
| CAPD  | 3,127,250 | (300,000 - 20,000,000) |
| HD    | 2,858,182 | (500,000 - 4,200,000)  |

**Sessions of PD per day**

**4**

**Dialysis sessions per patient per week**

**2**

**Complications**

**n**

|      |    |                                    |
|------|----|------------------------------------|
|      |    | *infection, peritonitis, bleeding, |
| CAPD | 18 | anemia, dyspneu, hernia            |
|      |    | *dyspneu, hypoglicemia,            |
| HD   | 14 | anaphylactic reaction, oedema      |

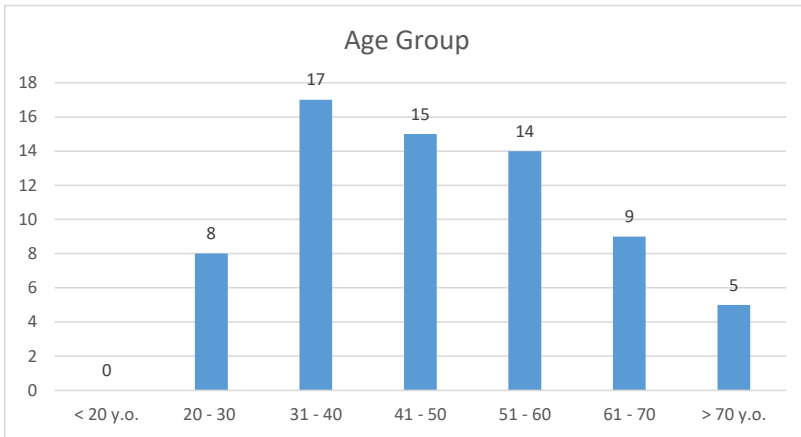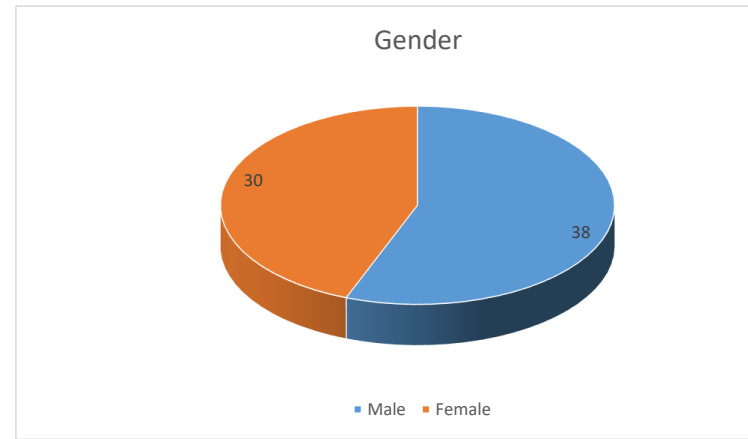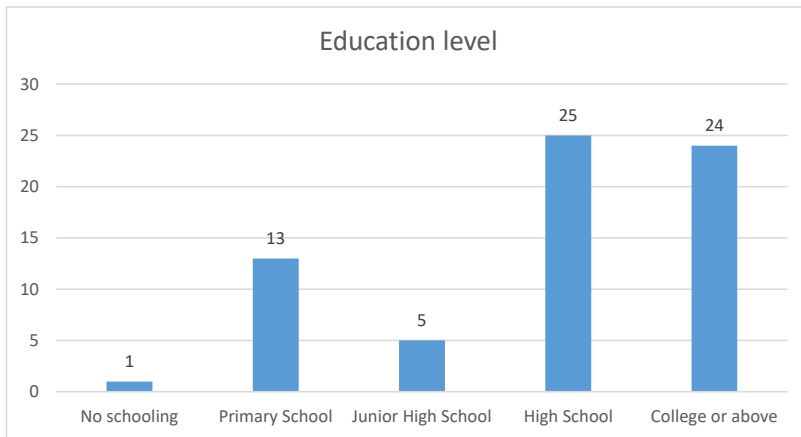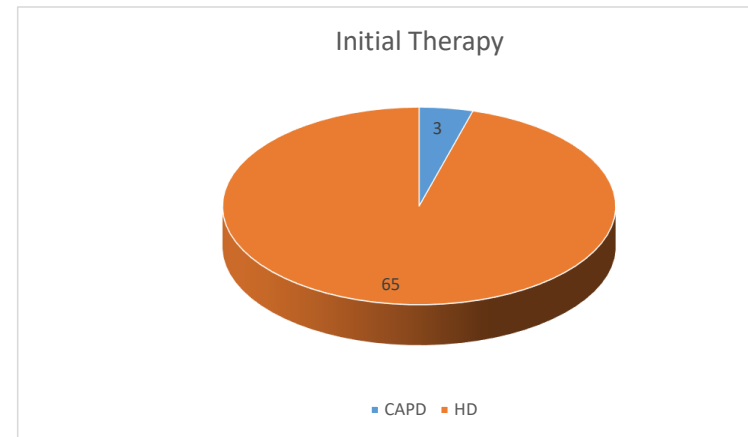

Current Therapy

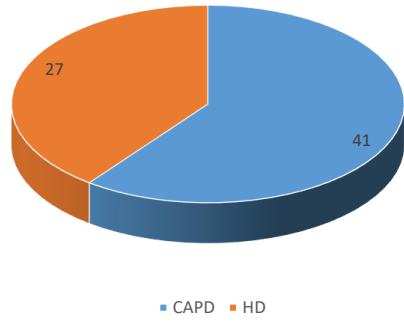

Duration of Therapy

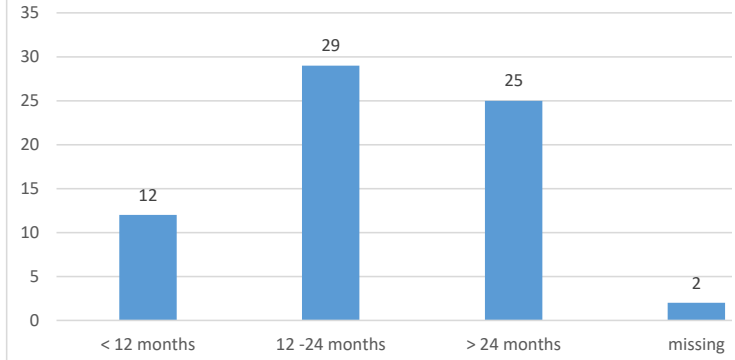

Comorbidities

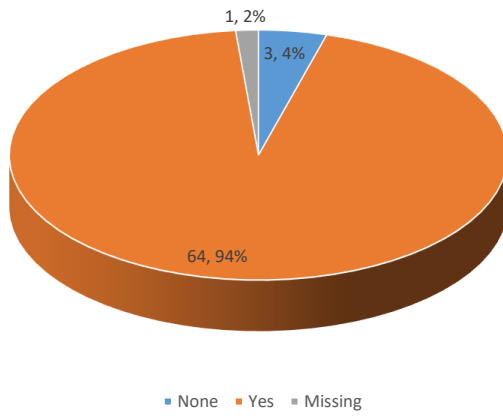

Number of Comorbidities

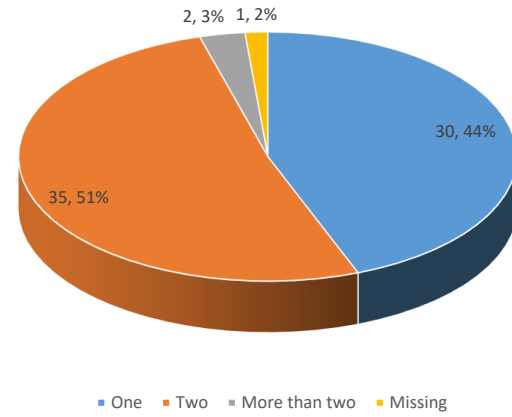

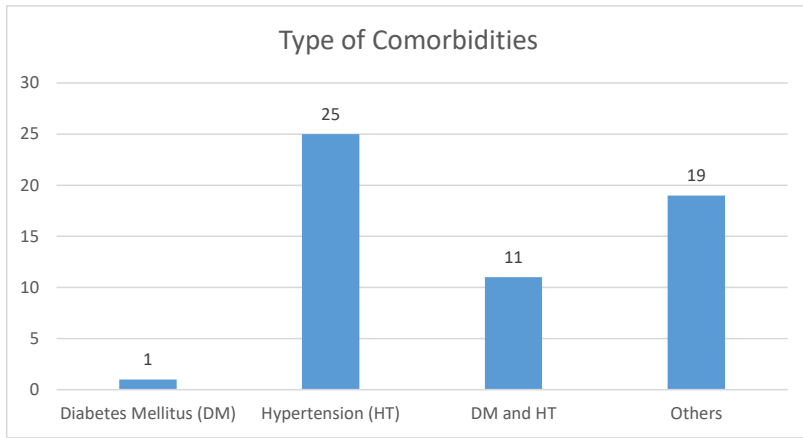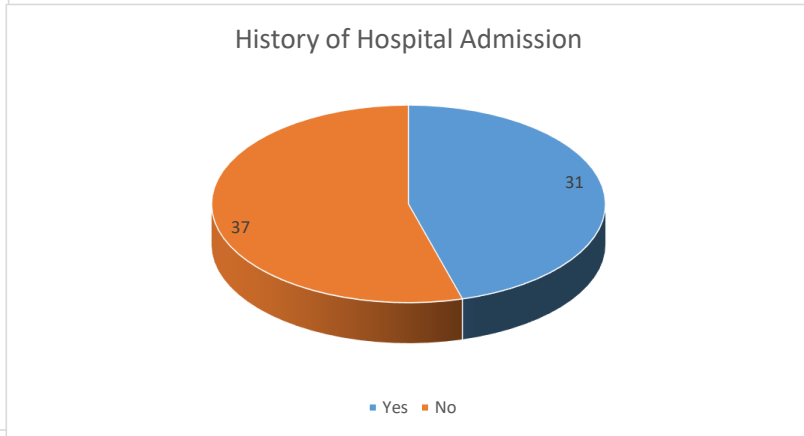



Companion to Hospital

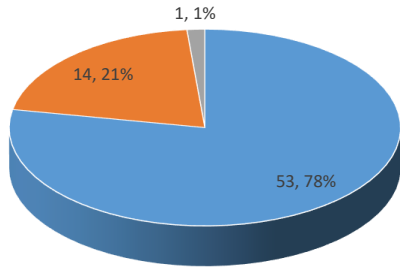

Companion

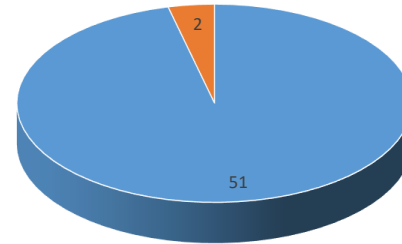

Transportation

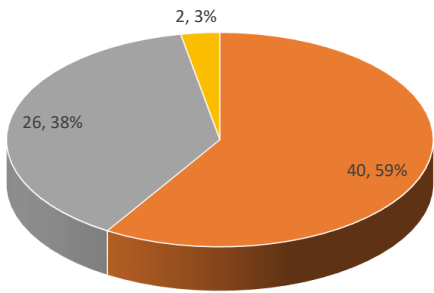

Employment - Total

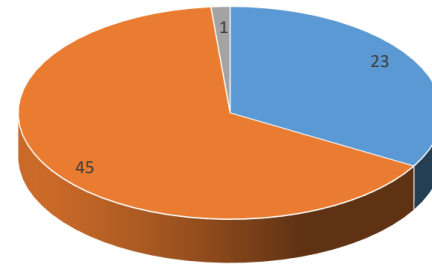

Employment - CAPD

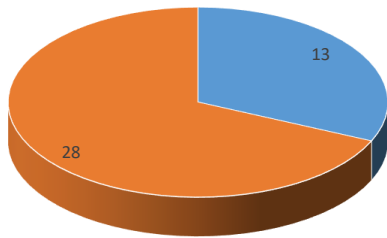

■ Employed ■ Unemployed

Employment - HD

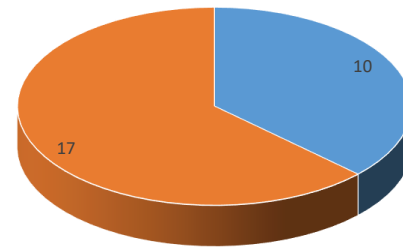

■ Employed ■ Unemployed

Type of Work - Patient

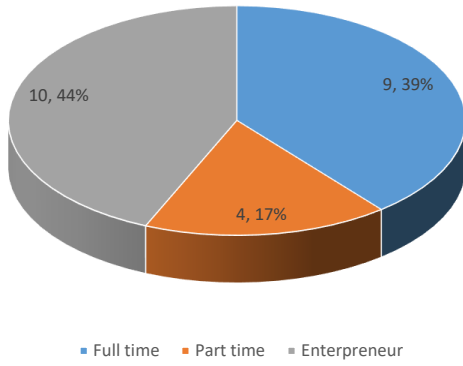

Employment - companion

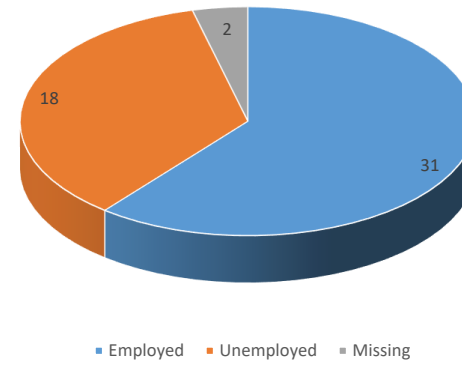

Type of Work - Companion

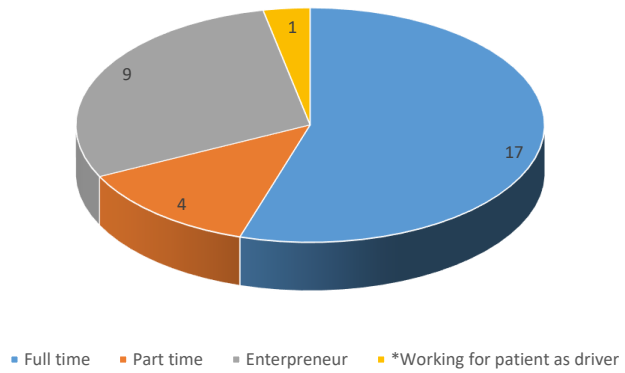

Complications

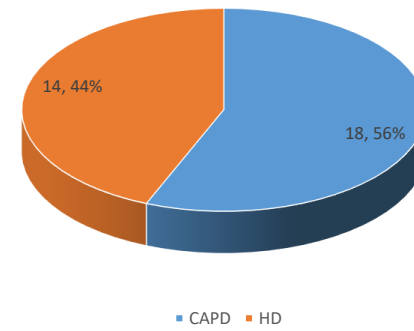

Supplement: pone.0177436.s003.pdf [file pone.0177436.s003.pdf]
