# Supplementary material for: Economic evaluation of policy options for dialysis in end-stage renal disease patients under the universal health coverage in Indonesia
Source: PubMed Central journal article supplement (PMC5436694; doi:10.1371/journal.pone.0177436), 2017-05-18
Supplement: pone.0177436.s001.pdf [file pone.0177436.s001.pdf]

# CAPD

Routine Costs included routine CAPD dialysis and other comorbidities (Both Outpatient and In-patient)

| No | Direct Med Cost for Routine CAPD in a year |           |           |            |                 |
|----|--------------------------------------------|-----------|-----------|------------|-----------------|
|    |                                            | Catheter  | Training  | Initial PD | PD Complication |
| 1  | 132,958,763                                |           |           |            |                 |
| 2  | 118,126,954                                |           |           |            |                 |
| 3  | 114,375,842                                |           |           |            |                 |
| 4  | 133,806,878                                |           |           |            |                 |
| 5  | 89,445,268                                 |           |           |            |                 |
| 6  | 114,824,843                                |           |           |            |                 |
| 7  | 108,826,309                                |           |           |            |                 |
| 8  | 125,753,421                                |           |           |            | 9,858,000       |
| 9  | 89,949,591                                 |           |           |            |                 |
| 10 | 95,153,871                                 |           |           |            |                 |
| 11 | 90,482,174                                 |           |           |            |                 |
| 12 | 109,874,770                                |           |           |            |                 |
| 13 | 103,915,923                                |           |           |            |                 |
| 14 | 70,896,821                                 |           |           |            |                 |
| 15 | 92,795,250                                 |           |           |            |                 |
| 16 | 92,795,250                                 |           |           |            |                 |
| 17 | 97,669,508                                 |           |           |            |                 |
| 18 | 141,380,459                                |           |           |            |                 |
| 19 | 97,110,648                                 |           |           |            |                 |
| 20 | 109,386,648                                |           |           |            |                 |
| 21 | 125,302,509                                |           |           |            |                 |
| 22 | 118,085,702                                |           |           |            |                 |
| 23 | 72,992,719                                 |           |           |            |                 |
| 24 | 73,775,582                                 |           |           |            |                 |
| 25 | 73,700,208                                 |           |           |            |                 |
| 26 | 73,059,150                                 |           |           |            |                 |
| 27 | 73,551,892                                 |           |           |            |                 |
| 28 | 73,846,294                                 | 9,790,900 | 1,729,300 | 11,520,200 |                 |
| 29 | 74,371,050                                 |           |           |            |                 |
| 30 | 73,160,833                                 |           |           |            |                 |
| 31 | 77,362,045                                 | 9,790,900 | 1,668,100 | 11,459,000 |                 |
| 32 | 72,442,876                                 | 9,790,900 | 1,287,600 | 11,078,500 | 2,707,600       |
| 33 | 72,925,713                                 |           |           |            |                 |
| 34 | 73,719,784                                 |           |           |            |                 |
| 35 | 73,643,277                                 | 9,790,900 | 1,151,300 | 10,942,200 |                 |
| 36 | 72,678,933                                 |           |           |            |                 |

|    |            |
|----|------------|
| 37 | 73,907,320 |
| 38 | 73,907,272 |
| 39 | 72,922,374 |
| 40 | 72,900,654 |
| 41 | 73,612,433 |
| 42 | 73,792,445 |
| 43 | 72,890,644 |
| 44 | 73,400,767 |
| 45 | 72,868,525 |
| 46 | 73,250,280 |
| 47 | 72,673,963 |
| 48 | 72,982,134 |
| 49 | 74,157,626 |

|      |               |           |                     |            |           |
|------|---------------|-----------|---------------------|------------|-----------|
| Sum  | 4,357,414,194 |           |                     |            |           |
| Mean | 88,926,820    | 9,790,900 | 1,459,075           | 11,249,975 | 6,282,800 |
| SD   | 20,852,571.60 |           | 283,338.51          | 283,338.51 | 5,056,096 |
| SE   | 2,978,938.80  |           | 141,669.25          | 141,669.25 | 3,575,200 |
|      |               |           | Room charge (Total) | -          | -         |
|      |               |           |                     | 11,249,975 | 6,282,800 |

**Adjust cost of PD complication with rate of PD complication in parameter sheet**

**Room charge**

|                                     |               |
|-------------------------------------|---------------|
| RSCM room charge class II = 325,000 | 325000        |
| RSKG room charge class II = 225,000 | 225000        |
| Mean room charge class II           | <b>275000</b> |
|                                     | 50000         |

**No of LOS for PD initial**

|                |   |
|----------------|---|
| LOS-PD-Initial | 9 |
|----------------|---|

**No of LOS for Peritonitis**

|                    |   |
|--------------------|---|
| LOS-PD-peritonitis | 7 |
|--------------------|---|

|                          |            |              |
|--------------------------|------------|--------------|
| <b>Total direct cost</b> |            | SE           |
| Total PD initial         | 13,724,975 | 141,669.25   |
| Total PD routine         | 88,926,820 | 2,978,938.80 |
| Total PD complicator     | 8,207,800  | 3,575,200    |



**HD**

Routine Costs included routine HD dialysis and other comorbidities

| No | Direct Med Cost for Routine HD per visit from Hospital billing | Direct Med Cost for Routine HD per Year | Initial HD | LOS | HD Complication |
|----|----------------------------------------------------------------|-----------------------------------------|------------|-----|-----------------|
| 1  | 1,156,205                                                      | 120,245,324                             |            |     |                 |
| 2  | 1,481,695                                                      | 154,096,263                             |            |     |                 |
| 3  |                                                                |                                         |            |     |                 |
| 4  | 877,626                                                        | 91,273,062                              |            |     |                 |
| 5  | 1,049,104                                                      | 109,106,782                             |            |     |                 |
| 6  | 1,195,928                                                      | 124,376,503                             |            |     |                 |
| 7  |                                                                |                                         |            |     |                 |
| 8  | 1,140,140                                                      | 118,574,574                             |            |     |                 |
| 9  |                                                                |                                         |            |     |                 |
| 10 | 1,040,627                                                      | 108,225,232                             |            |     |                 |
| 11 | 1,129,980                                                      | 117,517,944                             |            |     |                 |
| 12 | 1,042,041                                                      | 108,372,244                             |            |     |                 |
| 13 | 1,151,391                                                      | 119,744,692                             |            |     |                 |
| 14 |                                                                |                                         |            |     |                 |
| 15 | 1,495,271                                                      | 155,508,190                             |            |     |                 |
| 16 | 1,070,554                                                      | 111,337,592                             |            |     |                 |
| 17 | 1,028,543                                                      | 106,968,504                             |            |     | 34,463,124      |
| 18 | 1,405,648                                                      | 146,187,342                             |            |     |                 |
| 19 | 941,585                                                        | 97,924,888                              |            |     |                 |
| 20 | 1,053,896                                                      | 109,605,145                             |            |     |                 |
| 21 | 1,120,907                                                      | 116,574,367                             |            |     |                 |
| 22 | 1,126,771                                                      | 117,184,148                             |            |     |                 |
| 23 | 1,438,436                                                      | 149,597,331                             |            |     |                 |
| 24 | 1,355,379                                                      | 140,959,398                             |            |     |                 |
| 25 | 1,107,005                                                      | 115,128,553                             |            |     | 10,920,760      |
| 26 | 1,036,775                                                      | 107,824,571                             |            |     |                 |
| 27 | 1,060,041                                                      | 110,244,224                             |            |     |                 |
| 28 | 862,434                                                        | 89,693,121                              |            |     |                 |
| 29 | 1,094,239                                                      | 113,800,886                             |            |     | 24,761,975      |
| 30 | 872,630                                                        | 90,753,547                              |            |     |                 |
| 31 | 1,077,047                                                      | 112,012,842                             |            |     |                 |
| 32 | 939,744                                                        | 97,733,400                              |            |     | 14,473,000      |
| 33 | 928,403                                                        | 96,553,913                              |            |     | 680,400         |
| 34 | 880,970                                                        | 91,620,852                              |            |     | 8,281,800       |
| 35 | 965,641                                                        | 100,426,655                             | 8,803,625  |     | 4,155,825       |
| 36 | 834,410                                                        | 86,778,640                              |            | 10  | 5,439,450       |

|      |            |               |            |      |             |
|------|------------|---------------|------------|------|-------------|
| 37   | 1,193,443  | 124,118,121   |            |      |             |
| 38   | 912,854    | 94,936,848    | 9,331,200  | 8    |             |
| 39   | 975,403    | 101,441,893   |            |      |             |
| 40   | 1,011,767  | 105,223,733   |            |      |             |
| 41   | 1,075,753  | 111,878,361   |            |      |             |
| 42   | 927,382    | 96,447,706    | 15,358,500 | 11   |             |
| 43   | 873,650    | 90,859,600    |            |      | 2,265,875   |
| 44   | 946,825    | 98,469,800    |            |      |             |
| 45   | 921,323    | 95,817,589    |            |      |             |
| 46   | 1,046,722  | 108,859,133   |            |      |             |
| 47   |            |               |            |      |             |
| 48   | 943,953    | 98,171,163    |            |      | 3,226,175   |
| 49   | 937,842    | 97,535,600    |            |      |             |
| 50   |            |               |            |      |             |
| 51   | 1,042,347  | 108,404,053   |            |      | 3,801,575   |
| Sum  | 47,770,330 | 4,968,114,333 | 33,493,325 | 29   | 112,469,959 |
| Mean | 1,061,563  | 110,402,541   | 11,164,442 | 10   | 10,224,542  |
| SD   | 164,200.52 | 17,076,853.97 | 3,641,727  | 2    | 10,609,162  |
| SE   | 24,477.57  | 2,545,667.09  | 2,102,552  | 0.88 | 6,125,203   |

No of HD visit per year (expert opinion)

OPD visits 104

No of LOS for HD initial

LOS-HD-initail 9.67 1

No of LOD for HD Complication

LOS-HD-Comp 9.82 1.86

### Room Charge

RSCM room charge class II = 325,000

RSKG room charge class II = 225,000

Mean room charge cl **275000**

### Total direct cost

Total HD initial cost 13,822,775 2,102,552

Total HD Routine 110,402,541 2,545,667

Total HD complicaior 12,924,542 6,125,203

Adjust cost of HD complication with rate of HD complication in parameter sheet



**LOS**

16

12

19

14

2

10

5

11

5

9

5

---

---

9.82  
5  
2
