# Supplementary material for: Economic evaluation of policy options for dialysis in end-stage renal disease patients under the universal health coverage in Indonesia
Source: PubMed Central journal article supplement (PMC5436694; doi:10.1371/journal.pone.0177436), 2017-05-18
Supplement: pone.0177436.s002.pdf [file pone.0177436.s002.pdf]

| PD | Family/Companion Income Loss in a month | Family/Companion Income Loss in YEAR | 12 | HD | Family/Companion Income Loss in a month | Family/Companion Income Loss in YEAR |
|----|-----------------------------------------|--------------------------------------|----|----|-----------------------------------------|--------------------------------------|
| 1  | 250000                                  | 3000000                              |    | 1  | 0                                       | 0                                    |
| 2  | 150000                                  | 1800000                              |    | 2  | 0                                       | 0                                    |
| 3  | 60000                                   | 720000                               |    | 3  | 3000000                                 | 36000000                             |
| 4  | 125000                                  | 1500000                              |    | 4  | 0                                       | 0                                    |
| 5  | 225000                                  | 2700000                              |    | 5  | 0                                       | 0                                    |
| 6  | 0                                       | 0                                    |    | 6  | 0                                       | 0                                    |
| 7  | 40000                                   | 480000                               |    | 7  | 0                                       | 0                                    |
| 8  | 250000                                  | 3000000                              |    | 8  | 0                                       | 0                                    |
| 9  | 70000                                   | 840000                               |    | 9  | 0                                       | 0                                    |
| 10 | 300000                                  | 3600000                              |    | 10 | 0                                       | 0                                    |
| 11 | 110000                                  | 1320000                              |    | 11 | 0                                       | 0                                    |
| 12 | 109750                                  | 1317000                              |    | 12 | 0                                       | 0                                    |
| 13 | 250000                                  | 3000000                              |    | 13 | 2800000                                 | 33600000                             |
| 14 | 150000                                  | 1800000                              |    | 14 | 0                                       | 0                                    |
| 15 | 90000                                   | 1080000                              |    | 15 | 2400000                                 | 28800000                             |
| 16 | 120000                                  | 1440000                              |    | 16 | 0                                       | 0                                    |
| 17 | 0                                       | 0                                    |    | 17 | 600000                                  | 7200000                              |
| 18 | 0                                       | 0                                    |    | 18 | 700000                                  | 8400000                              |
| 19 | 62500                                   | 750000                               |    | 19 | 700000                                  | 8400000                              |
| 20 | 430000                                  | 5160000                              |    | 20 | 0                                       | 0                                    |
| 21 | 150000                                  | 1800000                              |    | 21 | 0                                       | 0                                    |
| 22 | 100000                                  | 1200000                              |    | 22 | 0                                       | 0                                    |
| 23 | 300000                                  | 3600000                              |    | 23 | 0                                       | 0                                    |
|    |                                         |                                      |    | 24 | 0                                       | 0                                    |
|    |                                         |                                      |    | 25 | 240000                                  | 2880000                              |
|    |                                         |                                      |    | 26 | 612000                                  | 7344000                              |
|    |                                         |                                      |    | 27 | 0                                       | 0                                    |
|    |                                         |                                      |    | 28 | 200000                                  | 2400000                              |
|    |                                         |                                      |    | 29 | 0                                       | 0                                    |
|    |                                         |                                      |    | 30 | 0                                       | 0                                    |
|    |                                         |                                      |    | 31 | 0                                       | 0                                    |
|    |                                         |                                      |    | 32 | 200000                                  | 2400000                              |
|    |                                         |                                      |    | 33 | 300000                                  | 3600000                              |
|    |                                         |                                      |    | 34 | 0                                       | 0                                    |
|    |                                         |                                      |    | 35 | 0                                       | 0                                    |
|    |                                         |                                      |    | 36 | 0                                       | 0                                    |
|    |                                         |                                      |    | 37 | 200000                                  | 2400000                              |
|    |                                         |                                      |    | 38 | 0                                       | 0                                    |
|    |                                         |                                      |    | 39 | 0                                       | 0                                    |
|    |                                         |                                      |    | 40 | 0                                       | 0                                    |
|    |                                         |                                      |    | 41 | 0                                       | 0                                    |
|    |                                         |                                      |    | 42 | 0                                       | 0                                    |
|    |                                         |                                      |    | 43 | 1200000                                 | 14400000                             |
|    |                                         |                                      |    | 44 | 0                                       | 0                                    |
|    |                                         |                                      |    | 45 | 0                                       | 0                                    |
|    |                                         |                                      |    | 46 | 0                                       | 0                                    |
|    |                                         |                                      |    | 47 | 0                                       | 0                                    |
|    |                                         |                                      |    | 48 | 0                                       | 0                                    |
|    |                                         |                                      |    | 49 | 0                                       | 0                                    |
|    |                                         |                                      |    | 50 | 0                                       | 0                                    |

**Indirect cost of PD**

|      |           |
|------|-----------|
| Mean | 1,743,783 |
| SD   | 1,302,865 |
| SE   | 271,666   |

**Indirect cost of HD**

|      |           |
|------|-----------|
| Mean | 3,156,480 |
| SD   | 8,061,043 |
| SE   | 1,140,004 |
